1 ***Coxiella burnetii* blocks intracellular IL-17 signaling in macrophages**

2

3 Tatiana M. Clemente<sup>1</sup>, Minal Mulye<sup>1</sup>, Anna V. Justis<sup>1</sup>, Srinivas Nallandhighal<sup>2</sup>, Tuan M. Tran<sup>2</sup>  
4 and Stacey D. Gilk<sup>1</sup>#

5

6 <sup>1</sup>Department of Microbiology and Immunology, Indiana University School of Medicine,  
7 Indianapolis, IN, United States of America.

8

9 <sup>2</sup>Division of Infectious Diseases, Department of Medicine, Indiana University School of  
10 Medicine, Indianapolis, IN, United States of America.

11

12 Running title: IL-17 signaling in *Coxiella*-infected macrophages

13

14 #Address correspondence to Stacey D. Gilk, [sgilk@iu.edu](mailto:sgilk@iu.edu)

15

16

17

18

19

20

21

22

23

24 **ABSTRACT**

25

26 *Coxiella burnetii* is an obligate intracellular bacterium and the etiological agent of Q fever.  
27 Successful host cell infection requires the *Coxiella* Type IVB Secretion System (T4BSS), which  
28 translocates bacterial effector proteins across the vacuole membrane into the host cytoplasm,  
29 where they manipulate a variety of cell processes. To identify host cell targets of *Coxiella*  
30 T4BSS effector proteins, we determined the transcriptome of murine alveolar macrophages  
31 infected with a *Coxiella* T4BSS effector mutant. We identified a set of inflammatory genes that  
32 are significantly upregulated in T4BSS mutant-infected cells compared to mock-infected cells or  
33 cells infected with wild type (WT) bacteria, suggesting *Coxiella* T4BSS effector proteins  
34 downregulate expression of these genes. In addition, the IL-17 signaling pathway was identified  
35 as one of the top pathways affected by the bacteria. While previous studies demonstrated that IL-  
36 17 plays a protective role against several pathogens, the role of IL-17 during *Coxiella* infection is  
37 unknown. We found that IL-17 kills intracellular *Coxiella* in a dose-dependent manner, with the  
38 T4BSS mutant exhibiting significantly more sensitivity to IL-17 than WT bacteria. In addition,  
39 quantitative PCR confirmed increased expression of IL-17 downstream signaling genes in  
40 T4BSS mutant-infected cells compared to WT or mock-infected cells, including the pro-  
41 inflammatory cytokines *Il1a*, *Il1b* and *Tnfa*, the chemokines *Cxcl2* and *Ccl5*, and the  
42 antimicrobial protein *Lcn2*. We further confirmed that the *Coxiella* T4BSS downregulates  
43 macrophage CXCL2/MIP-2 and CCL5/RANTES protein levels following IL-17 stimulation.  
44 Together, these data suggest that *Coxiella* downregulates IL-17 signaling in a T4BSS-dependent  
45 manner in order to escape the macrophage immune response.

46

47

## 48 INTRODUCTION

49 The intracellular bacterium *Coxiella burnetii* is the etiological agent of Q fever, a  
50 zoonotic infectious disease. Initially, Q fever manifests as an acute self-limited flu-like illness.  
51 However, patients can develop chronic disease that can be life threatening due to serious clinical  
52 manifestations such as endocarditis (1). Furthermore, the current therapy recommended for  
53 chronic Q fever requires at least 18 months of doxycycline and hydroxychloroquine treatment  
54 (2). An effective vaccine (Q-Vax) has been developed for humans but is currently licensed only  
55 in Australia due to adverse effects, especially when administered in previously infected  
56 populations (3). In addition, Q fever outbreaks have occurred in several countries, including the  
57 Netherlands (4), US (5), Spain (6), Australia (7), Japan (8) and Israel (9), exemplifying how  
58 expansive *C. burnetii* infection is worldwide and the need for novel therapeutic targets.

59 Human infection occurs primarily by inhaling contaminated dust or aerosols, often from  
60 close contact with livestock. In the lungs, *C. burnetii* displays tropism for alveolar macrophages,  
61 where it forms a phagolysosome-like parasitophorous vacuole (PV) necessary to support  
62 bacterial growth (10, 11). *C. burnetii*'s ability to survive and replicate inside the PV, an  
63 inhospitable environment for most bacteria, is a unique feature essential for *C. burnetii*  
64 pathogenesis. *C. burnetii* exploits the acidic PV pH for metabolic activation (12) and actively  
65 manipulates PV fusogenicity and maintenance (13). PV establishment requires translocation of  
66 bacterial proteins into the host cell cytoplasm by the *C. burnetii* *Dot/Icm* (defect in organelle  
67 trafficking/intracellular multiplication) type IVB secretion system (T4BSS), closely related to the  
68 *Dot/Icm* T4BSS of *Legionella pneumophila* (14). T4BSS effector proteins not only manipulate  
69 host vesicular trafficking during PV development, but also other cellular processes such as lipid

70 metabolism, host gene expression, apoptosis, host translation, iron transport, ubiquitination,  
71 autophagy and immunity (15, 16). Based on *in silico* prediction, there are more than 100 putative  
72 *C. burnetii* T4BSS effector proteins (17-19), but functional data is lacking for the majority of  
73 these proteins. In particular, the role of T4BSS effector proteins in manipulating the innate  
74 immune response is poorly understood. Recently, the *C. burnetii* T4BSS effector protein IcaA  
75 was found to inhibit caspase 11-mediated, non-canonical activation of the nucleotide binding  
76 domain and leucine rich repeat containing protein (NLRP3) inflammasome during *C. burnetii*  
77 infection (20). Since cytosolic lipopolysaccharide (LPS) is known to activate non-canonical  
78 inflammasomes (21, 22), it is possible that *C. burnetii* LPS triggers this pathway, and the  
79 bacterium utilizes T4BSS effectors such as IcaA to block this innate immune response. Given the  
80 low infectious dose (< 10 organisms) (23), *C. burnetii* certainly inhibits several immediate host  
81 cell responses in order to establish infection.

82         In order to identify new immune response pathways manipulated by *C. burnetii* T4BSS  
83 effector proteins, we compared the transcriptome of alveolar macrophages infected with wild  
84 type (WT) or a T4BSS mutant *C. burnetii*. We identified a set of inflammatory genes  
85 downregulated by *C. burnetii* T4BSS effector proteins, with the IL-17 signaling pathway being  
86 one of the top targeted host cell pathways. As IL-17 is a pro-inflammatory cytokine that plays a  
87 role in the protective response against a variety of bacterial infections, including the pulmonary  
88 intracellular pathogens *Mycoplasma pneumoniae*, *Mycobacterium tuberculosis*, *Francisella*  
89 *tularensis*, and *Legionella pneumophila* (24-27), we further investigated the role of IL-17 during  
90 *C. burnetii* infection. Our data revealed that stimulating the macrophage IL-17 signaling pathway  
91 leads to *C. burnetii* killing in a dose-dependent manner, with the T4BSS mutant displaying  
92 increased sensitivity compared to WT bacteria. Finally, our findings demonstrated that *C.*

93 *burnetii* downregulates the IL-17 signaling pathway in macrophages through T4BSS effector  
94 proteins.

95

## 96 **RESULTS**

### 97 **Differentially expressed genes in *C. burnetii*-infected macrophages**

98 In order to identify T4BSS-dependent changes in expression of host genes, we  
99 determined the whole transcriptome of murine alveolar macrophages (MH-S) infected with  
100 either wild type (WT) *C. burnetii* or a *C. burnetii* mutant lacking *icmD*, an essential component  
101 of the T4BSS (14). We previously found minimal differences in PV size and bacterial replication  
102 between WT and a T4BSS mutant *C. burnetii* during the first 48 hours of infection of MH-S  
103 macrophages (28). Thus, to avoid changes in host cell gene expression that could occur due to  
104 PV expansion and bacterial replication after 48 hours, and because *C. burnetii* T4BSS effector  
105 protein secretion occurs by four hours post infection (29), we analyzed gene expression at 24 and  
106 48 hours post infection (hpi). By principal components analysis (PCA), global transcription in  
107 T4BSS-mutant-infected cells more closely resembled mock-infected cells than WT-infected  
108 cells, suggesting that the active T4BSS in WT bacteria drastically alters the host cell response to  
109 *C. burnetii* infection (Fig. 1A). The number of differentially expressed genes (DEGs) were  
110 determined for each comparison at 24 or 48 hpi, using an absolute fold-change threshold of >1.5  
111 and false discovery rate (FDR) <5% (Supplementary Data Set 1). The largest differences in gene  
112 expression at 24 hpi and 48 hpi were for the *icmD* mutant-infected vs. WT-infected comparison  
113 (110 DEGs at 24 hpi) and WT-infected vs. mock-infected comparison (116 DEGs at 48 hpi),  
114 respectively (Fig. 1B, Supplementary Data Set 1). Unsupervised hierarchical cluster analysis of  
115 fold-change values for DEGs (absolute log<sub>2</sub> fold-change > 0.585; FDR<5%) across all six

116 possible two-way comparisons revealed that the majority of DEGs were upregulated in *icmD*  
117 mutant-infected compared to WT-infected cells (*icmD* vs. WT) (Fig. 1C). In contrast, the  
118 majority of DEGs were downregulated in WT-infected vs. mock-infected cells (WT vs. mock).  
119 Overall there were fewer downregulated genes in the *icmD* mutant-infected cells vs. mock-  
120 infected cells (*icmD* vs. mock). This provides evidence that *C. burnetii* T4BSS effector proteins  
121 may play a role in the downregulation of host cell genes during the initial stages of infection.

122 To identify biological pathways targeted by *C. burnetii* T4BSS effector proteins, we used  
123 two methods: gene set enrichment via CERNO testing (30) using Gene Ontology (GO)  
124 annotations as gene sets (Supplementary Fig. 1) and the Ingenuity Pathways Analysis (IPA)  
125 using DEGs with an absolute  $\log_2$  fold-change  $> 0.585$  and FDR  $< 5\%$  as input (Fig. 1D and  
126 Supplementary Fig. 2). Both methods revealed differential expression of several immune and  
127 inflammatory pathways, including pathogen recognition and activation of Interferon-regulatory  
128 factor (IRF) by cytosolic pattern recognition receptors (PRRs) and transmembrane PRRs,  
129 signaling pathways induced by the pro-inflammatory cytokines IL-1 $\alpha$  and IL-1 $\beta$ , chemokine  
130 activity, T cell migration and NF-Kb phosphorylation. In addition, our data indicate that the *C.*  
131 *burnetii* T4BSS significantly downregulates the macrophage type I interferon (IFN) response.  
132 This finding supports published data that *C. burnetii* does not induce a robust type I IFN  
133 response in macrophages (31). In addition, IL-17 signaling was among the top three  
134 overrepresented canonical pathways between mutant and WT infection (Fig. 1D) with upstream  
135 regulator analysis predicting activation of IL-17 signaling in *icmD* mutant-infected cells relative  
136 to mock-infected cells (Supplementary Fig. 2). Given that IL-17 is known to be an important  
137 pro-inflammatory cytokine against several pulmonary pathogens, we specifically tested for  
138 differential expression of IL-17 related genes (32) using self-contained gene set testing. The IL-

139 17 gene set was overexpressed in *icmD* mutant-infected macrophages relative to WT-infected  
140 macrophages (Supplementary Table 1), suggesting that the *C. burnetii* T4BSS downregulates IL-  
141 17 signaling in macrophages.

142 To validate the transcriptome analysis, we used quantitative reverse transcription PCR  
143 (RT-qPCR) of infected macrophages to test expression of IL-17 pathway and other pro-  
144 inflammatory genes. RNA was isolated from MH-S macrophages infected with either WT  
145 *C. burnetii* or *C. burnetii* mutant lacking *dotA*, another essential component of the T4BSS (33).  
146 Like the *icmD* mutant, the *dotA* mutant does not translocate T4BSS effector proteins, allowing us  
147 to confirm that gene expression changes are indeed T4BSS-dependent. Lipopolysaccharide  
148 (LPS), a potent stimulator of the inflammatory response (34), served as a positive control.  
149 Between the WT and *dotA* mutant-infected macrophages, we observed a significant difference in  
150 gene expression of the pro-inflammatory genes *Il1a*, *Il1b* and *Tnfa* (Fig. 2A-C) as well as the IL-  
151 17 signaling pathway chemokines *Cxcl2/Mip2* and *Ccl5/Rantes* (Fig. 2D-E) and the  
152 antimicrobial protein Lipocalin-2 (*Lcn2*) (Fig. 2F). These genes were upregulated in the *dotA*  
153 mutant-infected macrophages compared to WT-infected macrophages, with more significant  
154 differences at 24 hpi compared to 48 hpi. *IL-17A* itself was not differentially regulated in either  
155 our RNAseq data or RT-qPCR (data not shown), which is not surprising given that macrophages  
156 produce very little IL-17 (35). These data suggest that, during the early stages of macrophage  
157 infection, the *C. burnetii* T4BSS may target the IL-17 pathway in order to downregulate  
158 expression of several pro-inflammatory genes.

159

160 ***C. burnetii* downregulates CXCL2/MIP-2 and CCL5/RANTES expression in a T4BSS-**  
161 **dependent manner**

162           A number of studies have shown that IL-17 plays an important role in the innate immune  
163 response against bacteria by stimulating secretion of multiple chemokines. Within the context of  
164 infection, these chemokines recruit macrophages, neutrophils, and lymphocytes to the infection  
165 site, thereby enhancing inflammation. To validate the gene expression changes between  
166 macrophages infected with WT or the T4BSS mutant, we measured secretion of CXCL2/MIP-2  
167 and CCL5/RANTES at 24 or 48 hpi using ELISA. We observed a significant difference in  
168 CXCL2/MIP-2 and CCL5/RANTES protein levels between the WT and *dotA* mutant-infected  
169 macrophages, with a 3-fold increase of both cytokines in the *dotA* mutant-infected macrophages  
170 (Fig. 3A-B), confirming the gene expression data. While CXCL2/MIP-2 was significantly higher  
171 at both 24 and 48 hpi, we only detected a difference in CCL5/RANTES expression at 24 hpi  
172 (Fig. 3B).

173           LCN2 expression is strongly induced by IL-17 and blocks catecholate-type siderophores  
174 of gram-negative bacteria, preventing the bacteria from scavenging free iron required for  
175 bacterial growth (36, 37). While *Lcn2* gene expression was differentially regulated (Fig. 2F), we  
176 did not observe a significant difference in secreted LCN2 protein between the WT versus *dotA*  
177 mutant-infected macrophages at either 24 or 48 hpi (Fig. 3C). These conflicting data may be due  
178 to post-translational regulation of LCN2 (38). However, our data does suggest that the *C.*  
179 *burnetii* T4BSS downregulates macrophage secretion of the chemokines CXCL2/MIP-2 and  
180 CCL5/RANTES during infection.

181

182 ***C. burnetii* T4BSS effector proteins impair IL-17-stimulated CXCL2/MIP-2 and**  
183 **CCL5/RANTES secretion**



184           The chemo-attractant CXCL2/MIP-2 is typically secreted by monocytes and  
185 macrophages and recruits neutrophils required for pathogen clearance (39). Furthermore,  
186 CCL5/RANTES, which is secreted by lymphocytes, macrophages, and endothelial cells, also  
187 recruits and activates leukocytes (40). We first confirmed that IL-17 upregulates CXCL2/MIP-2  
188 and CCL5/RANTES in MH-S alveolar macrophages by treating uninfected macrophages with  
189 recombinant mouse IL-17A and analyzing the cell-free supernatant by ELISA. In uninfected  
190 macrophages, CXCL2/MIP-2 and CCL5/RANTES increased 14-fold and 2-fold, respectively,  
191 following IL-17A treatment for 24 hours (Fig. 4A-B). To test if *C. burnetii* T4BSS effector  
192 proteins block IL-17-stimulated chemokine secretion, WT or *dotA* mutant-infected macrophages  
193 were treated with IL-17A for 24 hours. In IL-17 stimulated macrophages infected with WT  
194 bacteria, CXCL2/MIP-2 decreased 2.2-fold compared to stimulated mock-infected macrophages,  
195 while CCL5/RANTES decreased 1.6-fold (Fig. 4A-B), suggesting that WT *C. burnetii* blocks IL-  
196 17-induced chemokine secretion. Further, *dotA* mutant *C. burnetii* did not block IL-17A-  
197 stimulated CXCL2/MIP-2 and CCL5/RANTES (Fig. 4A-B). These data suggest that the *C.*  
198 *burnetii* T4BSS impairs IL-17 signaling in macrophages, including secretion of CXCL2/MIP-2  
199 and CCL5/RANTES.

200

### 201 **Triggering the macrophage IL-17 pathway is bactericidal**

202           Several studies have demonstrated that IL-17 plays a protective role for the host during  
203 bacterial infections (32, 41-43). To evaluate if IL-17 affects *C. burnetii* viability in macrophages,  
204 we treated infected macrophages at 24 or 48 hpi with recombinant mouse IL-17A and  
205 enumerated viable bacteria 24 hours later using a fluorescent infectious focus-forming unit  
206 (FFU) assay in Vero cells (44). IL-17 stimulation decreased *C. burnetii* viability at 24 and 48 hpi

207 in a dose dependent-manner, with a ~40% decrease at the highest concentration (Supplementary  
208 Fig. 3). IL-17A treatment did not affect the macrophage viability (data no shown). Interestingly,  
209 *C. burnetii* appears more resistant to IL-17 stimulation at 48 hpi compared to 24 hpi, as low  
210 concentrations of IL-17 (50 ng/ml) led to significant loss of the bacteria viability only at 24 hpi  
211 (Supplementary Fig. 3A-B). To determine if the T4BSS is related to bacteria susceptibility to IL-  
212 17, we infected macrophages with either WT or *dotA* *C. burnetii*, stimulated with IL-17A, and  
213 measured bacteria viability by colony-forming unit (CFU) assay on agarose plates (45). We  
214 observed a stronger bactericidal effect of IL-17 on *dotA* mutant *C. burnetii* compared to WT *C.*  
215 *burnetii*, as the presence of 25 and 12.5 ng/ml of IL-17 led to 47% and 39% loss of *dotA* mutant  
216 *C. burnetii* viability, respectively, but did not affect WT *C. burnetii* viability (Fig. 5A and  
217 Supplementary Fig. 4). To further assess the specificity of IL-17 activity, we treated infected  
218 cells with IL-17 (50 or 100 ng/ml) in the presence or absence of an antibody that blocks the IL-  
219 17 receptor. The IL-17 bactericidal effect was significantly neutralized by blocking the IL-17  
220 receptor, as the co-treatment with IL-17 and the anti-IL-17 receptor antibody rescued over 30%  
221 of the bacteria viability when compared to IL-17 treated infected cells (Fig. 5B and  
222 Supplementary Fig. 4).

223 In order to validate the bactericidal effect of IL-17 in primary cells, human monocyte-  
224 derived macrophages (hMDMs) were infected with WT or *dotA* *C. burnetii*, treated at 24 hpi  
225 with recombinant human IL-17A, and bacterial viability was measured after 24 hours by CFU  
226 assay. Confirming our results obtained in MH-S cells, the *dotA* T4BSS mutant viability  
227 decreased with IL-17 treatment (Fig. 5C and Supplementary Fig. 4), with a 50% decrease in  
228 viable bacteria at 100 ng/ml. However, IL-17 had no effect on WT *C. burnetii* in primary

229 hMDMs. Together, these data suggest that activation of the IL-17 signaling pathway in  
230 macrophages kills intracellular *C. burnetii*, with the *C. burnetii* T4BSS playing a protective role.

231

## 232 **DISCUSSION**

233 The innate immune response relies on pathogen detection by pattern recognition  
234 receptors which activate signaling pathways and trigger an inflammatory response (46). While  
235 essential to protect the host, pathogens such as *C. burnetii* have evolved strategies to overcome  
236 the host innate immune response (47, 48). Despite being sequestered in a growth-permissive  
237 vacuole, *C. burnetii*  
238 T4BSS effector proteins manipulate a variety of host cell signaling processes, including the  
239 innate immune responses of inflammasome-mediated pyroptotic and apoptotic cell death (20, 49-  
240 51). To identify potential targets of *C. burnetii* T4BSS effector proteins, we compared the  
241 transcriptome of murine alveolar macrophages infected either with WT or T4BSS mutant *C.*  
242 *burnetii*. We identified several inflammatory pathways downregulated by *C. burnetii* T4BSS  
243 effector proteins, including IL-17 signaling. Previous studies demonstrated that IL-17 plays a  
244 protective role against several pathogens, including *L. pneumophila*, the closest pathogenic  
245 relative to *C. burnetii* (25-27, 41, 42). We found that *C. burnetii* downregulates the macrophage  
246 IL-17 signaling pathway in a T4BSS-dependent manner, protecting the bacteria from IL-17-  
247 mediated killing by the macrophage and blocking secretion of pro-inflammatory chemokines. To  
248 our knowledge, this is the first demonstration of a pathogenic bacteria directly downregulating  
249 intracellular macrophage IL-17 signaling.

250 Previous studies demonstrated that *C. burnetii* infection leads to secretion of the pro-  
251 inflammatory cytokines TNF $\alpha$  and IFN $\gamma$ , with both cytokines playing critical roles in restricting

252 *C. burnetii* replication (52-54). In our studies, gene expression analysis during the early stages of  
253 infection revealed striking differences in the immunological response to WT and T4BSS mutant  
254 *C. burnetii*, with *C. burnetii* T4BSS mutant-infected macrophages having a stronger pro-  
255 inflammatory response. For example, the pro-inflammatory genes *Il1a*, *Il1b* and *Tnfa* are  
256 expressed at higher levels in macrophages infected with T4BSS mutant *C. burnetii*, compared to  
257 WT-infected macrophages. Bacterial-driven downregulation of these and other pro-inflammatory  
258 cytokines would benefit the bacteria in establishing infection. In support of our data, *C. burnetii*  
259 infection of primary macrophages does not activate caspase-1 (20), an enzyme required for the  
260 production of the pro-inflammatory cytokines IL-1 $\beta$  and IL-1 $\alpha$  (55, 56). Interestingly, *C. burnetii*  
261 does not directly inhibit caspase-1 activation but appears to interfere with upstream signaling  
262 events, including blocking TNF $\alpha$  signaling (20, 57). However, a recent study did not detect  
263 significant differences in TNF $\alpha$  production in murine bone-marrow derived macrophages  
264 infected with WT *C. burnetii* or *icmL C. burnetii*, a mutant with non-functional T4BSS (31).  
265 These apparently conflicting data may be explained by the use of C57BL/6 mice in the latter  
266 study; C57BL/6 mice, in contrast to other inbred mouse strains, are not permissive for  
267 intracellular *C. burnetii* replication due to the large amount of TNF $\alpha$  produced upon toll-like  
268 receptor (TLR) stimulation (31, 58-60). Further experimentation is required to elucidate the  
269 mechanism(s) behind *C. burnetii* T4BSS-mediated downregulation of macrophage pro-  
270 inflammatory response.

271 Pathogen-associated molecular patterns (PAMPs) are sensed by different PRRs, which  
272 activate IRFs and initiate key inflammatory responses including transcription of type I  
273 interferons (IFN) and IFN-inducible genes (61, 62). Type I IFN can be induced by many  
274 intracellular bacterial pathogens, either via recognition of bacterial surface molecules such as

275 LPS, or through stimulatory ligands released by the bacteria via specialized bacterial secretion  
276 systems (63). Our transcriptome analysis revealed *C. burnetii* T4BSS-mediated downregulation  
277 of macrophage IRF activation by cytosolic and transmembrane PRRs. A recent study found that  
278 *C. burnetii* does not trigger cytosolic PRRs or induce robust type I IFN production in mouse  
279 macrophages (31). Additionally, IFN- $\alpha$  receptor-deficient (IFNAR<sup>-/-</sup>) mice were protected from  
280 *C. burnetii* infection, suggesting that type I IFNs are not required to restrict bacterial replication  
281 (31, 64). However, delivery of recombinant IFN- $\alpha$  to the lung of *C. burnetii*-infected mice  
282 protected against bacterial replication, revealing a potential role of type I IFN in control of *C.*  
283 *burnetii* infection in the lung (64). Interestingly, type I IFN is induced during *L. pneumophila*  
284 infection and plays a key role in macrophage defense by restricting intracellular bacterial  
285 replication (65, 66). However, to counteract this host immune response, the *L. pneumophila*  
286 T4SS effector protein SdhA suppresses induction of IFN through an unknown mechanism (67).  
287 Similarly, our data suggests that *C. burnetii* T4BSS effector proteins negatively modulate the  
288 type I IFN response in alveolar macrophages, most likely as a bacterial immune evasion  
289 mechanism.

290 In addition to pro-inflammatory cytokines and PRRs, we discovered an important role for  
291 the cytokine IL-17 during *C. burnetii* infection of macrophages. The protective role of IL-17  
292 against extracellular bacteria has been extensively studied; additionally, IL-17 can be critical for  
293 the full immune response leading to the control of intracellular bacteria (32, 42, 43, 68). IL-17 is  
294 produced by T helper 17 (Th17) cells,  $\gamma\delta$  T cells and invariant natural killer T (iNKT) cells (69).  
295 In the lung,  $\gamma\delta$  T cells have been implicated as a primary source of early IL-17 production in  
296 several *in vivo* models of infection (70), which may have implications for *C. burnetii* lung  
297 infection. Exogenous IL-17 binds the IL-17 receptor on the surface of the macrophage, triggering

298 chemokine secretion, neutrophil recruitment, and a Th1 response, thus enhancing bacterial  
299 clearance (26, 27, 71, 72). By both gene expression and protein analysis, we found that *C.*  
300 *burnetii* downregulates IL-17-stimulated chemokine secretion in macrophages in a T4BSS-  
301 dependent manner. A previous study found that following *C. burnetii* aerosol infection in mice,  
302 neutrophils are not present in the airways until 7 days post infection, though the mechanism of  
303 this delay remains unknown (73). Further, neutrophils play a critical role in inflammation and  
304 bacterial clearance following intranasal *C. burnetii* infection, but it is unknown whether  
305 neutrophils directly kill the bacteria or serve to enhance the immune response (74). Based on our  
306 findings in alveolar macrophages, we hypothesize that *C. burnetii* T4BSS effector proteins  
307 downregulate the IL-17 pathway to suppress chemokine secretion as a mechanism to avoid  
308 neutrophil recruitment at early stages of infection. This could be an important immune evasion  
309 strategy that enables the bacteria to establish long-term persistence. In addition to chemokines,  
310 the IL-17-stimulated protein LCN2 may also be downregulated by *C. burnetii*. LCN2 is a  
311 siderophore-binding antimicrobial protein that can limit bacterial growth by iron restriction.

312         A previous study demonstrated that *C. burnetii*-infected IL-17 receptor knockout mice  
313 had a similar bacterial burden in the spleen and lung as infected WT mice, suggesting that IL-17  
314 does not play an essential role during *C. burnetii* infection (74). In contrast, our *in vitro* studies  
315 revealed that activating the IL-17 signaling pathway in macrophages can directly kill  
316 intracellular *C. burnetii*. Further, the *C. burnetii* T4BSS appears to play a protective role,  
317 presumably by blocking the intracellular signaling pathway triggered by IL-17 binding to the IL-  
318 17R. Our data may explain the lack of phenotypic changes in IL-17 receptor knockout mice  
319 infected by WT *C. burnetii*, as the intracellular signaling pathway is not activated in the absence  
320 of the IL-17 receptor.

321           During acute *C. burnetii* infection in humans, the number of  $\gamma\delta$  T cells rise significantly  
322 in the peripheral blood of patients (75). Given that  $\gamma\delta$  T cells can secrete large amounts of IL-17  
323 (76), it is possible that the downregulation of the intracellular IL-17 signaling by T4BSS effector  
324 proteins might be an essential mechanism of immune evasion that allows *C. burnetii* persistence.  
325 IL-17 activates common downstream pathways in macrophages, including NF- $\kappa$ B (Nuclear  
326 factor- $\kappa$ B) and MAPKs (mitogen-activated protein kinases) (77, 78). Our transcriptome data  
327 suggests that the *C. burnetii* T4BSS downregulates the IL-17 canonical NF- $\kappa$ B signaling  
328 pathway, including *Il17ra*, *Il17rc*, *Traf6*, *Nfkb1* and *Nfkb2*. This hypothesis is consistent with a  
329 recent study that found that *C. burnetii* can modulate NF- $\kappa$ B canonical pathway through the  
330 T4BSS (79). NF- $\kappa$ B activation correlates with enhanced expression of inducible nitric oxide  
331 synthase (iNOS) (80) and NADPH oxidase (NOX) (81), which generate nitric oxide (NO) and  
332 reactive oxygen species (ROS), respectively. Both NO and ROS are signature molecules for M1  
333 macrophages (82), while *C. burnetii*-infected macrophages exhibit a M2-polarization that is  
334 unable to control bacterial replication (83). As IL-17 alters macrophage polarization (84), one  
335 potential mechanism is that IL-17 polarizes toward M1 phenotype, triggering ROS and NO  
336 leading to *C. burnetii* killing. In addition, as IFN $\gamma$  plays a clear role in *C. burnetii* killing (53,  
337 54), the IL-17-bactericidal effect might be related to IFN $\gamma$ , as IL-17 can induce an IFN $\gamma$  response  
338 (85). Further experimentation is needed to not only identify the *C. burnetii* T4BSS effector  
339 protein modulating IL-17 signaling in macrophages, but also how IL-17 leads to *C. burnetii*  
340 death inside of macrophages.

341           In summary, this study suggests that *C. burnetii* employs the T4BSS to downregulate IL-  
342 17 signaling in macrophages during the early stages of infection. This has important implications  
343 in both controlling the pro-inflammatory response elicited by the macrophages, as well as

344 avoiding direct killing by the macrophage. Further studies identifying the bacterial T4BSS  
345 effector proteins involved in this mechanism and elucidating how IL-17 kills *C. burnetii* will  
346 give new insight into immune evasion by *C. burnetii*.

347

## 348 **MATERIALS AND METHODS**

### 349 **Bacteria and mammalian cells**

350 *Coxiella burnetii* Nine Mile Phase II (NMII, clone 4, RSA439) were purified from Vero  
351 cells (African green monkey kidney epithelial cells, CCL-81; American Type Culture Collection,  
352 Manassas, VA) and stored as previously described (86). For all experiments *C. burnetii* NMII  
353 wild type (WT), *icmD* (14) and *dotA* (33) mutants were grown for 4 days in ACCM-2, at 37°C in  
354 2.5% O<sub>2</sub> and 5% CO<sub>2</sub>, washed twice with phosphate buffered saline (PBS) and stored as  
355 previously described (87). Murine alveolar macrophages (MH-S; CRL-2019 ATCC) were  
356 maintained in growth media consisting of RPMI (Roswell Park Memorial Institute) 1640  
357 medium (Corning, New York, NY, USA) containing 10% fetal bovine serum (FBS, Atlanta  
358 Biologicals, Norcross, GA, USA) at 37°C and 5% CO<sub>2</sub>. The multiplicity of infection (MOI) for  
359 each bacteria stock was optimized for each bacteria stock and culture vessel for a final infection  
360 of approximately 1 internalized bacterium per cell. To obtain human monocyte derived  
361 macrophages (hMDM), peripheral blood mononuclear cells were isolated from buffy coats  
362 (Indiana Blood Center) using Ficoll-Paque (GE Healthcare # 17144002). Monocytes were  
363 isolated from lymphocytes by positive selection using CD14 magnetic beads (Dynabeads®  
364 FlowComp™ Human CD14 – catalog # 11367D). Following isolation, monocytes were cultured  
365 for seven days with RPMI 1640 medium containing 10% FBS, 100 mg/ml  
366 penicillin/streptomycin and 50 ng/ml human macrophage colony-stimulating factor (M-CSF;



367 ThermoFisher Scientific, catalog # 14-8789-62). 24 hours prior infection, the media containing  
368 antibiotics and M-CSF was replaced with RPMI 1640 containing 10% FBS.

369

### 370 **RNA sequencing**

371 MH-S cells ( $4 \times 10^5$  cells per well of a 6-well plate) were mock-infected or infected with  
372 WT or *icmD* mutant *C. burnetii*, with three replicates per condition. Total RNA was isolated at  
373 24 and 48 hpi using RNeasy Plus Mini Kit (Qiagen). RNA samples had an RNA integrity  
374 number  $>7$ , as determined on an Agilent 2100 Bioanalyzer. RNA-seq libraries were prepared  
375 using the ScriptSeq Complete kit (Illumina, Inc) according to the manufacturer's instructions.  
376 Libraries were sequenced at 30 million reads per sample on an Illumina NextSeq platform with  
377 read lengths of 75 bp by Indiana University Bloomington Center for Genomics and  
378 Bioinformatics and mapped to the mouse reference genome mm10 by the Indiana University  
379 Center for Computation Biology and Bioinformatics. RNA processing and sequencing were  
380 performed as a single batch. The median library size (mapped reads) was 17.8 million reads with  
381 a minimum of 13.4 million reads.

### 382 **Gene expression analysis**

383 RNAseq differential gene expression (DGE) analysis was performed using the edgeR  
384 package (version 3.16.5) in R (version 3.3.3). After filtering genes with low expression across a  
385 majority of samples, trimmed mean of M values (TMM) normalization was applied to the  
386 remaining 9400 genes. Expression data for these genes were converted to log counts-per-million  
387 (logCPM) for data visualization with principal components analysis (PCA) plots. DGE analysis  
388 was performed using the glmLRT function as 2-way comparisons between the three classes  
389 using the following model matrix formula:  $\sim 0 + \text{Infection\_Time}$  where Infection\_Time is

390 combined factor variable consisting of cell treatment and time point (six levels). The fold change  
391 in gene expression was determined by comparing wild type or *icmD* mutant-infected to mock-  
392 infected cells or each other at either 24h or 48h (six different comparisons). Differential  
393 expression of functional pathways was assessed by two methods using the list of differentially  
394 expressed genes (DEGs) for each comparison: 1) gene enrichment analysis using CERNO testing  
395 in the *tmod* package (version 0.31) (30) in R with Gene Ontology (GO, C5 in MSigDB (88))  
396 annotations as gene sets and all DEGs without cut-off criteria but ranked by ascending P values  
397 and 2) Ingenuity Pathways Analysis (version 42012434) using DEGs with  $|\log_2FC| > 0.585$  (1.5 in  
398 linear space) and FDR < 5% as input. In addition, self-contained gene set testing for enrichment of  
399 IL-17 related genes (32) was also performed using the *roast*. *DGElist* function in the *edgeR*  
400 package and the following gene list: *Ccl5*, *Il17rc*, *Lcn2*, *Traf6*, *Il17ra*, *Nfkb1*, *Nfkb2*, *Ccl2*, and  
401 *Ccl3*.

402

### 403 **Quantitative gene expression by real time-PCR (qRT-PCR)**

404 MH-S cells ( $2 \times 10^5$  cells per well of a 6-well plate) were mock-infected or infected with  
405 WT or *dotA* mutant *C. burnetii* in 0.5 ml growth media for 2 hours at 37°C and 5% CO<sub>2</sub>, washed  
406 extensively with PBS and incubated in 2 ml of growth media. Cells treated with LPS (100 ng/ml)  
407 from *Escherichia coli* O111:B4 (Sigma, catalog # L4392) were used as a positive control. RNA  
408 was isolated using the RNeasy Plus Mini Kit at 24 and 48 hpi, analyzed for quantity and  
409 A260/280 ratio (Implen NanoPhotometer), and cDNA generated using Super Script III First-  
410 strand synthesis system kit (Invitrogen). Real time PCR using Luminaris™ Color HiGreen qPCR  
411 Master Mix (ThermoScientific) was done on a Bio-Rad CFX Connect Real-Time System  
412 according to manufacturer's instructions. Mouse specific primers were (5' to 3'): *Il1b*, forward:

413 TGTAATGAAAGACGGCACACC; reverse: TCTTCTTTGGGTATTGCTTGG; *Illa*, forward:  
414 CGCTTGAGTCGGCAAAGAAAT; reverse: ACAAACTGATCTGTGCAAGTCTC; *Tnfa*,  
415 forward: TTCTGTCTACTGAACTTCGGG; reverse: GTATGAGATAGCAAATCGGCT;  
416 CCL5/RANTES, forward: ACTCCCTGCTGCTTTGCCTAC; reverse:  
417 ACTTGCTGGTGTAGAAATACT; CXCL2/MIP-2, forward: CGCTGTCAATGCCTGAAGAC;  
418 reverse: ACACTCAAGCTCTGGATGTTCTTG; *Lcn2*, forward:  
419 TTTCACCCGCTTTGCCAAGT; reverse: GTCTCTGCGCATCCCAGTCA; GAPDH, forward:  
420 AAGGTCATCCCAGAGCTGAA; reverse: CTGCTTCACCACCTTCTTGA. The relative levels  
421 of transcripts were calculated with the  $\Delta\Delta C_t$  method using *Gapdh* as the internal control. The  
422 relative levels of mRNA from the mock-infected samples were adjusted to 1 and served as the  
423 basal control value. Each experiment was done in biological duplicate, and qPCR performed on  
424 three separate cDNA preparations from each RNA.

425

## 426 **ELISA**

427 CXCL2-MIP-2, CCL5-RANTES and Lipocalin-2 protein levels in cell-free supernatants  
428 were measured by ELISA (R&D Systems, Minneapolis, MN) according to the manufacturer's  
429 instructions. In brief, MH-S cells ( $5 \times 10^4$  cells per well of a 24-well plate) were plated and  
430 allowed to adhere overnight. The cells were then mock-infected or infected with WT or *dotA*  
431 mutant *C. burnetii* in 0.25 ml growth media for 2 h at 37°C and 5% CO<sub>2</sub>, washed extensively  
432 with PBS and incubated in 0.5 ml growth media. To examine the IL-17 pathway expression in  
433 infected cells, the cells were pre-treated with 100 ng/ml of IL-17A recombinant mouse protein  
434 (ThermoFisher, catalog # PMC0174) for 24 hours, and then infected as previously described.  
435 LPS-treated cells (100 ng/ml; Sigma catalog number L4391) were used as a positive control. The

436 cell supernatant was collected at 24 or 48 hpi, centrifuged at 20,000×g for 10 min, and analyzed  
437 by ELISA. Each experiment was performed in biological duplicate with two technical replicates.

438

439 ***C. burnetii* viability by fluorescent infectious focus-forming unit (FFU) and colony-forming**  
440 **unit (CFU) assays**

441 MH-S cells ( $5 \times 10^4$  cells per well of a 24-well plate) were plated and allowed to adhere  
442 overnight, while monocytes ( $1 \times 10^5$  cells per well of a 24 well plate) were plated and  
443 differentiated to hMDMs for seven days. The cells were then mock-infected or infected with WT  
444 or *dotA* mutant *C. burnetii* in 0.25 ml growth media for 2 h at 37°C, 5% CO<sub>2</sub>, washed extensively  
445 with PBS and incubated in 0.5 ml growth media. At the indicated time points, the cells were  
446 treated with different concentrations of either recombinant mouse IL-17A or recombinant human  
447 IL-17A (ThermoFisher, catalog # 14-8179-62) for 24 hours. The cells were lysed in sterile water  
448 for 5 min and analyzed by FFU assay as previously described (89). For the CFU assay, the  
449 released bacteria were diluted 1:5 in ACCM-2 and plated in 2-fold serial dilutions onto 0.25%  
450 ACCM-2 agarose plates (45). Plates were incubated for 7-9 days at 37°C, 2.5% O<sub>2</sub> and 5% CO<sub>2</sub>  
451 and the number of colonies counted to measure bacteria viability. Each experiment was  
452 performed in biological duplicate and spotted in triplicate.

453

454 **Antibody neutralization**

455 MH-S cells ( $5 \times 10^4$ ) were mock-infected or infected with WT or *dotA* mutant *C. burnetii*,  
456 in a 24-well plate. At 24 hpi, the cells were treated with 50 or 100 ng/ml of IL-17A, in the  
457 presence or absence of 2 µg/ml of anti-IL-17Ra monoclonal antibody (ThermoFisher Scientific,  
458 catalog # MAB4481), for 24 hours. Bacteria were released by water lysis and analyzed by CFU

459 assay as described above. Each experiment was performed in biological duplicate and spotted in  
460 triplicate.

461

## 462 **Data analysis**

463 Statistical analyses were performed using ordinary one-way ANOVA with Dunnett's or  
464 Turkey's multiple comparisons tests in Prism 7 (GraphPad Software, Inc La Jolla, CA).

465

## 466 **ACKNOWLEDGEMENTS**

467 We thank Mark Kaplan and Dhritiman Samanta for helpful discussions, and James Ford, Hongyu  
468 Gao and Yunlong Liu for assistance with RNA sequencing and bioinformatics. This research was  
469 supported by the National Institute of Allergy and Infectious Diseases, NIH (AI121786 to SDG;  
470 5K08AI125682 to TMT).

471

## 472 **REFERENCES**

- 473 1. Maurin M, Raoult D. 1999. Q fever. *Clin Microbiol Rev* 12:518-53.
- 474 2. Mazokopakis EE, Karefilakis CM, Starakis IK. 2010. Q fever endocarditis. *Infect Disord*  
475 *Drug Targets* 10:27-31.
- 476 3. Ackland JR, Worswick DA, Marmion BP. 1994. Vaccine prophylaxis of Q fever. A  
477 follow-up study of the efficacy of Q-Vax (CSL) 1985-1990. *Med J Aust* 160:704-8.
- 478 4. Kampschreur LM, Dekker S, Hagenaars JC, Lestrade PJ, Renders NH, de Jager-Leclercq  
479 MG, Hermans MH, Groot CA, Groenwold RH, Hoepelman AI, Wever PC, Oosterheert  
480 JJ. 2012. Identification of risk factors for chronic Q fever, the Netherlands. *Emerg Infect*  
481 *Dis* 18:563-70.
- 482 5. Bjork A, Marsden-Haug N, Nett RJ, Kersh GJ, Nicholson W, Gibson D, Szymanski T,  
483 Emery M, Kohrs P, Woodhall D, Anderson AD. 2014. First reported multistate human Q  
484 fever outbreak in the United States, 2011. *Vector Borne Zoonotic Dis* 14:111-7.

- 485 6. Alonso E, Lopez-Etxaniz I, Hurtado A, Liendo P, Urbaneja F, Aspritzaga I, Olaizola JI,  
486 Pinero A, Arrazola I, Barandika JF, Hernaez S, Muniozgueren N, Garcia-Perez AL. 2015.  
487 Q Fever Outbreak among Workers at a Waste-Sorting Plant. PLoS One 10:e0138817.
- 488 7. Archer BN, Hallahan C, Stanley P, Seward K, Lesjak M, Hope K, Brown A. 2017.  
489 Atypical outbreak of Q fever affecting low-risk residents of a remote rural town in New  
490 South Wales. Commun Dis Intell Q Rep 41:E125-e133.
- 491 8. Porter SR, Czaplicki G, Mainil J, Horii Y, Misawa N, Saegerman C. 2011. Q fever in  
492 Japan: an update review. Vet Microbiol 149:298-306.
- 493 9. Amitai Z, Bromberg M, Bernstein M, Raveh D, Keysary A, David D, Pitlik S, Swerdlow  
494 D, Massung R, Rzotkiewicz S, Halutz O, Shohat T. 2010. A large Q fever outbreak in an  
495 urban school in central Israel. Clin Infect Dis 50:1433-8.
- 496 10. Stein A, Louveau C, Lepidi H, Ricci F, Baylac P, Davoust B, Raoult D. 2005. Q fever  
497 pneumonia: virulence of *Coxiella burnetii* pathovars in a murine model of aerosol  
498 infection. Infect Immun 73:2469-77.
- 499 11. Khavkin T, Tabibzadeh SS. 1988. Histologic, immunofluorescence, and electron  
500 microscopic study of infectious process in mouse lung after intranasal challenge with  
501 *Coxiella burnetii*. Infect Immun 56:1792-9.
- 502 12. Hackstadt T, Williams JC. 1981. Biochemical stratagem for obligate parasitism of  
503 eukaryotic cells by *Coxiella burnetii*. Proc Natl Acad Sci U S A 78:3240-4.
- 504 13. Howe D, Melnicakova J, Barak I, Heinzen RA. 2003. Maturation of the *Coxiella burnetii*  
505 parasitophorous vacuole requires bacterial protein synthesis but not replication. Cell  
506 Microbiol 5:469-80.
- 507 14. Beare PA, Gilk SD, Larson CL, Hill J, Stead CM, Omsland A, Cockrell DC, Howe D,  
508 Voth DE, Heinzen RA. 2011. Dot/Icm type IVB secretion system requirements for  
509 *Coxiella burnetii* growth in human macrophages. MBio 2:e00175-11.
- 510 15. van Schaik EJ, Chen C, Mertens K, Weber MM, Samuel JE. 2013. Molecular  
511 pathogenesis of the obligate intracellular bacterium *Coxiella burnetii*. Nat Rev Microbiol  
512 11:561-73.
- 513 16. Qiu J, Luo ZQ. 2017. *Legionella* and *Coxiella* effectors: strength in diversity and activity.  
514 Nat Rev Microbiol 15:591-605.

- 515 17. Chen C, Banga S, Mertens K, Weber MM, Gorbaslieva I, Tan Y, Luo ZQ, Samuel JE.  
516 2010. Large-scale identification and translocation of type IV secretion substrates by  
517 *Coxiella burnetii*. Proc Natl Acad Sci U S A 107:21755-60.
- 518 18. Voth DE, Beare PA, Howe D, Sharma UM, Samoilis G, Cockrell DC, Omsland A,  
519 Heinzen RA. 2011. The *Coxiella burnetii* cryptic plasmid is enriched in genes encoding  
520 type IV secretion system substrates. J Bacteriol 193:1493-503.
- 521 19. Lifshitz Z, Burstein D, Peeri M, Zusman T, Schwartz K, Shuman HA, Pupko T, Segal G.  
522 2013. Computational modeling and experimental validation of the *Legionella* and  
523 *Coxiella* virulence-related type-IVB secretion signal. Proc Natl Acad Sci U S A  
524 110:E707-15.
- 525 20. Cunha LD, Ribeiro JM, Fernandes TD, Massis LM, Khoo CA, Moffatt JH, Newton HJ,  
526 Roy CR, Zamboni DS. 2015. Inhibition of inflammasome activation by *Coxiella burnetii*  
527 type IV secretion system effector IcaA. Nat Commun 6:10205.
- 528 21. Hagar JA, Powell DA, Aachoui Y, Ernst RK, Miao EA. 2013. Cytoplasmic LPS activates  
529 caspase-11: implications in TLR4-independent endotoxic shock. Science 341:1250-3.
- 530 22. Kayagaki N, Wong MT, Stowe IB, Ramani SR, Gonzalez LC, Akashi-Takamura S,  
531 Miyake K, Zhang J, Lee WP, Muszynski A, Forsberg LS, Carlson RW, Dixit VM. 2013.  
532 Noncanonical inflammasome activation by intracellular LPS independent of TLR4.  
533 Science 341:1246-9.
- 534 23. Brooke RJ, Kretzschmar ME, Mutters NT, Teunis PF. 2013. Human dose response  
535 relation for airborne exposure to *Coxiella burnetii*. BMC Infect Dis 13:488.
- 536 24. Wu Q, Martin RJ, Rino JG, Breed R, Torres RM, Chu HW. 2007. IL-23-dependent IL-17  
537 production is essential in neutrophil recruitment and activity in mouse lung defense  
538 against respiratory *Mycoplasma pneumoniae* infection. Microbes Infect 9:78-86.
- 539 25. Gopal R, Monin L, Slight S, Uche U, Blanchard E, Fallert Junecko BA, Ramos-Payan R,  
540 Stallings CL, Reinhart TA, Kolls JK, Kaushal D, Nagarajan U, Rangel-Moreno J, Khader  
541 SA. 2014. Unexpected role for IL-17 in protective immunity against hypervirulent  
542 *Mycobacterium tuberculosis* HN878 infection. PLoS Pathog 10:e1004099.
- 543 26. Lin Y, Ritchea S, Logar A, Slight S, Messmer M, Rangel-Moreno J, Guglani L, Alcorn  
544 JF, Strawbridge H, Park SM, Onishi R, Nyugen N, Walter MJ, Pociask D, Randall TD,  
545 Gaffen SL, Iwakura Y, Kolls JK, Khader SA. 2009. Interleukin-17 is required for T

- 546 helper 1 cell immunity and host resistance to the intracellular pathogen *Francisella*  
547 *tularensis*. *Immunity* 31:799-810.
- 548 27. Kimizuka Y, Kimura S, Saga T, Ishii M, Hasegawa N, Betsuyaku T, Iwakura Y, Tateda  
549 K, Yamaguchi K. 2012. Roles of interleukin-17 in an experimental *Legionella*  
550 *pneumophila* pneumonia model. *Infect Immun* 80:1121-7.
- 551 28. Mulye M, Zapata B, Gilk SD. 2018. Altering lipid droplet homeostasis affects *Coxiella*  
552 *burnetii* intracellular growth. *PLoS One* 13:e0192215.
- 553 29. Newton HJ, McDonough JA, Roy CR. 2013. Effector protein translocation by the  
554 *Coxiella burnetii* Dot/Icm type IV secretion system requires endocytic maturation of the  
555 pathogen-occupied vacuole. *PLoS One* 8:e54566.
- 556 30. Weiner 3rd J, Domaszewska T. 2016. tmod: an R package for general and multivariate  
557 enrichment analysis. *PeerJ Preprints* 4:e2420v1.
- 558 31. Bradley WP, Boyer MA, Nguyen HT, Birdwell LD, Yu J, Ribeiro JM, Weiss SR,  
559 Zamboni DS, Roy CR, Shin S. 2016. Primary Role for Toll-Like Receptor-Driven Tumor  
560 Necrosis Factor Rather than Cytosolic Immune Detection in Restricting *Coxiella burnetii*  
561 Phase II Replication within Mouse Macrophages. *Infect Immun* 84:998-1015.
- 562 32. Onishi RM, Gaffen SL. 2010. Interleukin-17 and its target genes: mechanisms of  
563 interleukin-17 function in disease. *Immunology* 129:311-21.
- 564 33. Beare PA, Larson CL, Gilk SD, Heinzen RA. 2012. Two systems for targeted gene  
565 deletion in *Coxiella burnetii*. *Appl Environ Microbiol* 78:4580-9.
- 566 34. Rosenfeld Y, Shai Y. 2006. Lipopolysaccharide (Endotoxin)-host defense antibacterial  
567 peptides interactions: role in bacterial resistance and prevention of sepsis. *Biochim*  
568 *Biophys Acta* 1758:1513-22.
- 569 35. Ishigame H, Kakuta S, Nagai T, Kadoki M, Nambu A, Komiyama Y, Fujikado N,  
570 Tanahashi Y, Akitsu A, Kotaki H, Sudo K, Nakae S, Sasakawa C, Iwakura Y. 2009.  
571 Differential roles of interleukin-17A and -17F in host defense against mucoepithelial  
572 bacterial infection and allergic responses. *Immunity* 30:108-19.
- 573 36. Flo TH, Smith KD, Sato S, Rodriguez DJ, Holmes MA, Strong RK, Akira S, Aderem A.  
574 2004. Lipocalin 2 mediates an innate immune response to bacterial infection by  
575 sequestering iron. *Nature* 432:917-21.



- 576 37. Karlsen JR, Borregaard N, Cowland JB. 2010. Induction of neutrophil gelatinase-  
577 associated lipocalin expression by co-stimulation with interleukin-17 and tumor necrosis  
578 factor-alpha is controlled by IkappaB-zeta but neither by C/EBP-beta nor C/EBP-delta. J  
579 Biol Chem 285:14088-100.
- 580 38. Suk K. 2016. Lipocalin-2 as a therapeutic target for brain injury: An astrocentric  
581 perspective. Prog Neurobiol 144:158-72.
- 582 39. Ye P, Garvey PB, Zhang P, Nelson S, Bagby G, Summer WR, Schwarzenberger P,  
583 Shellito JE, Kolls JK. 2001. Interleukin-17 and lung host defense against *Klebsiella*  
584 *pneumoniae* infection. Am J Respir Cell Mol Biol 25:335-40.
- 585 40. Appay V, Rowland-Jones SL. 2001. RANTES: a versatile and controversial chemokine.  
586 Trends Immunol 22:83-7.
- 587 41. Cooper AM. 2009. IL-17 and anti-bacterial immunity: protection versus tissue damage.  
588 Eur J Immunol 39:649-52.
- 589 42. Khader SA, Gopal R. 2010. IL-17 in protective immunity to intracellular pathogens.  
590 Virulence 1:423-427.
- 591 43. Guglani L, Khader SA. 2010. Th17 cytokines in mucosal immunity and inflammation.  
592 Curr Opin HIV AIDS 5:120-7.
- 593 44. Coleman SA, Fischer ER, Howe D, Mead DJ, Heinzen RA. 2004. Temporal analysis of  
594 *Coxiella burnetii* morphological differentiation. J Bacteriol 186:7344-52.
- 595 45. Vallejo Esquerra E, Yang H, Sanchez SE, Omsland A. 2017. Physicochemical and  
596 Nutritional Requirements for Axenic Replication Suggest Physiological Basis for  
597 *Coxiella burnetii* Niche Restriction. Front Cell Infect Microbiol 7:190.
- 598 46. Medzhitov R. 2007. Recognition of microorganisms and activation of the immune  
599 response. Nature 449:819-26.
- 600 47. Baxt LA, Garza-Mayers AC, Goldberg MB. 2013. Bacterial subversion of host innate  
601 immune pathways. Science 340:697-701.
- 602 48. Cunha LD, Zamboni DS. 2013. Subversion of inflammasome activation and pyroptosis  
603 by pathogenic bacteria. Front Cell Infect Microbiol 3:76.
- 604 49. Luhrmann A, Roy CR. 2007. *Coxiella burnetii* inhibits activation of host cell apoptosis  
605 through a mechanism that involves preventing cytochrome c release from mitochondria.  
606 Infect Immun 75:5282-9.

- 607 50. Luhrmann A, Nogueira CV, Carey KL, Roy CR. 2010. Inhibition of pathogen-induced  
608 apoptosis by a *Coxiella burnetii* type IV effector protein. Proc Natl Acad Sci U S A  
609 107:18997-9001.
- 610 51. Klingenbeck L, Eckart RA, Berens C, Luhrmann A. 2013. The *Coxiella burnetii* type IV  
611 secretion system substrate CaeB inhibits intrinsic apoptosis at the mitochondrial level.  
612 Cell Microbiol 15:675-87.
- 613 52. Zamboni DS, Campos MA, Torrecilhas AC, Kiss K, Samuel JE, Golenbock DT, Lauw  
614 FN, Roy CR, Almeida IC, Gazzinelli RT. 2004. Stimulation of toll-like receptor 2 by  
615 *Coxiella burnetii* is required for macrophage production of pro-inflammatory cytokines  
616 and resistance to infection. J Biol Chem 279:54405-15.
- 617 53. Dellacasagrande J, Capo C, Raoult D, Mege JL. 1999. IFN-gamma-mediated control of  
618 *Coxiella burnetii* survival in monocytes: the role of cell apoptosis and TNF. J Immunol  
619 162:2259-65.
- 620 54. Dellacasagrande J, Ghigo E, Raoult D, Capo C, Mege JL. 2002. IFN-gamma-induced  
621 apoptosis and microbicidal activity in monocytes harboring the intracellular bacterium  
622 *Coxiella burnetii* require membrane TNF and homotypic cell adherence. J Immunol  
623 169:6309-15.
- 624 55. Fettelschoss A, Kistowska M, LeibundGut-Landmann S, Beer HD, Johansen P, Senti G,  
625 Contassot E, Bachmann MF, French LE, Oxenius A, Kundig TM. 2011. Inflammasome  
626 activation and IL-1beta target IL-1alpha for secretion as opposed to surface expression.  
627 Proc Natl Acad Sci U S A 108:18055-60.
- 628 56. Mariathasan S, Monack DM. 2007. Inflammasome adaptors and sensors: intracellular  
629 regulators of infection and inflammation. Nat Rev Immunol 7:31-40.
- 630 57. Furuoka M, Ozaki K, Sadatomi D, Mamiya S, Yonezawa T, Tanimura S, Takeda K.  
631 2016. TNF-alpha Induces Caspase-1 Activation Independently of Simultaneously  
632 Induced NLRP3 in 3T3-L1 Cells. J Cell Physiol 231:2761-7.
- 633 58. Zamboni DS, Mortara RA, Freymuller E, Rabinovitch M. 2002. Mouse resident  
634 peritoneal macrophages partially control in vitro infection with *Coxiella burnetii* phase II.  
635 Microbes Infect 4:591-8.

- 636 59. Yoshiie K, Matayoshi S, Fujimura T, Maeno N, Oda H. 1999. Induced production of  
637 nitric oxide and sensitivity of alveolar macrophages derived from mice with different  
638 sensitivity to *Coxiella burnetii*. Acta Virol 43:273-8.
- 639 60. Zamboni DS. 2004. Genetic control of natural resistance of mouse macrophages to  
640 *Coxiella burnetii* infection in vitro: macrophages from restrictive strains control  
641 parasitophorous vacuole maturation. Infect Immun 72:2395-9.
- 642 61. Takeuchi O, Akira S. 2010. Pattern recognition receptors and inflammation. Cell  
643 140:805-20.
- 644 62. Zhao GN, Jiang DS, Li H. 2015. Interferon regulatory factors: at the crossroads of  
645 immunity, metabolism, and disease. Biochim Biophys Acta 1852:365-78.
- 646 63. Monroe KM, McWhirter SM, Vance RE. 2010. Induction of type I interferons by  
647 bacteria. Cell Microbiol 12:881-90.
- 648 64. Hedges JF, Robison A, Kimmel E, Christensen K, Lucas E, Ramstead A, Jutila MA.  
649 2016. Type I Interferon Counters or Promotes *Coxiella burnetii* Replication Dependent  
650 on Tissue. Infect Immun 84:1815-25.
- 651 65. Plumlee CR, Lee C, Beg AA, Decker T, Shuman HA, Schindler C. 2009. Interferons  
652 direct an effective innate response to *Legionella pneumophila* infection. J Biol Chem  
653 284:30058-66.
- 654 66. Schiavoni G, Mauri C, Carlei D, Belardelli F, Pastoris MC, Proietti E. 2004. Type I IFN  
655 protects permissive macrophages from *Legionella pneumophila* infection through an  
656 IFN-gamma-independent pathway. J Immunol 173:1266-75.
- 657 67. Monroe KM, McWhirter SM, Vance RE. 2009. Identification of host cytosolic sensors  
658 and bacterial factors regulating the type I interferon response to *Legionella pneumophila*.  
659 PLoS Pathog 5:e1000665.
- 660 68. Curtis MM, Way SS. 2009. Interleukin-17 in host defence against bacterial,  
661 mycobacterial and fungal pathogens. Immunology 126:177-85.
- 662 69. Jin W, Dong C. 2013. IL-17 cytokines in immunity and inflammation. Emerg Microbes  
663 Infect 2:e60.
- 664 70. Liu J, Qu H, Li Q, Ye L, Ma G, Wan H. 2013. The responses of gammadelta T-cells  
665 against acute *Pseudomonas aeruginosa* pulmonary infection in mice via interleukin-17.  
666 Pathog Dis 68:44-51.

- 667 71. Chen J, Liao MY, Gao XL, Zhong Q, Tang TT, Yu X, Liao YH, Cheng X. 2013. IL-17A  
668 induces pro-inflammatory cytokines production in macrophages via MAPKinases, NF-  
669 kappaB and AP-1. *Cell Physiol Biochem* 32:1265-74.
- 670 72. Barin JG, Baldeviano GC, Talor MV, Wu L, Ong S, Quader F, Chen P, Zheng D,  
671 Caturegli P, Rose NR, Cihakova D. 2012. Macrophages participate in IL-17-mediated  
672 inflammation. *Eur J Immunol* 42:726-36.
- 673 73. Elliott A, Peng Y, Zhang G. 2013. *Coxiella burnetii* interaction with neutrophils and  
674 macrophages in vitro and in SCID mice following aerosol infection. *Infect Immun*  
675 81:4604-14.
- 676 74. Elliott A, Schoenlaub L, Freches D, Mitchell W, Zhang G. 2015. Neutrophils play an  
677 important role in protective immunity against *Coxiella burnetii* infection. *Infect Immun*  
678 83:3104-13.
- 679 75. Schneider T JH, Liesenfeld O, Steinhoff D, Riecken EO, Zeitz M, Ullrich R. 1997. The  
680 number and proportion of Vgamma9 Vdelta2 T cells rise significantly in the peripheral  
681 blood of patients after the onset of acute *Coxiella burnetii* infection.  
682 . *Clin Infect Dis* 24:261-264.
- 683 76. Papotto PH, Ribot JC, Silva-Santos B. 2017. IL-17(+) gammadelta T cells as kick-starters  
684 of inflammation. *Nat Immunol* 18:604-611.
- 685 77. Sonder SU, Saret S, Tang W, Sturdevant DE, Porcella SF, Siebenlist U. 2011. IL-17-  
686 induced NF-kappaB activation via CIKS/Act1: physiologic significance and signaling  
687 mechanisms. *J Biol Chem* 286:12881-90.
- 688 78. Hata K, Andoh A, Shimada M, Fujino S, Bamba S, Araki Y, Okuno T, Fujiyama Y,  
689 Bamba T. 2002. IL-17 stimulates inflammatory responses via NF-kappaB and MAP  
690 kinase pathways in human colonic myofibroblasts. *Am J Physiol Gastrointest Liver*  
691 *Physiol* 282:G1035-44.
- 692 79. Mahapatra S, Gallaher B, Smith SC, Graham JG, Voth DE, Shaw EI. 2016. *Coxiella*  
693 *burnetii* Employs the Dot/Icm Type IV Secretion System to Modulate Host NF-  
694 kappaB/RelA Activation. *Front Cell Infect Microbiol* 6:188.
- 695 80. Hatano E, Bennett BL, Manning AM, Qian T, Lemasters JJ, Brenner DA. 2001. NF-  
696 kappaB stimulates inducible nitric oxide synthase to protect mouse hepatocytes from  
697 TNF-alpha- and Fas-mediated apoptosis. *Gastroenterology* 120:1251-62.

- 698 81. Anrather J, Racchumi G, Iadecola C. 2006. NF-kappaB regulates phagocytic NADPH  
699 oxidase by inducing the expression of gp91phox. *J Biol Chem* 281:5657-67.
- 700 82. Jablonski KA, Amici SA, Webb LM, Ruiz-Rosado Jde D, Popovich PG, Partida-Sanchez  
701 S, Guerau-de-Arellano M. 2015. Novel Markers to Delineate Murine M1 and M2  
702 Macrophages. *PLoS One* 10:e0145342.
- 703 83. Benoit M, Barbarat B, Bernard A, Olive D, Mege JL. 2008. *Coxiella burnetii*, the agent  
704 of Q fever, stimulates an atypical M2 activation program in human macrophages. *Eur J*  
705 *Immunol* 38:1065-70.
- 706 84. Zhang Q, Atsuta I, Liu S, Chen C, Shi S, Shi S, Le AD. 2013. IL-17-mediated M1/M2  
707 macrophage alteration contributes to pathogenesis of bisphosphonate-related  
708 osteonecrosis of the jaws. *Clin Cancer Res* 19:3176-88.
- 709 85. Eid RE, Rao DA, Zhou J, Lo SF, Ranjbaran H, Gallo A, Sokol SI, Pfau S, Pober JS,  
710 Tellides G. 2009. Interleukin-17 and interferon-gamma are produced concomitantly by  
711 human coronary artery-infiltrating T cells and act synergistically on vascular smooth  
712 muscle cells. *Circulation* 119:1424-32.
- 713 86. Cockrell DC, Beare PA, Fischer ER, Howe D, Heinzen RA. 2008. A method for  
714 purifying obligate intracellular *Coxiella burnetii* that employs digitonin lysis of host cells.  
715 *J Microbiol Methods* 72:321-5.
- 716 87. Omsland A, Cockrell DC, Howe D, Fischer ER, Virtaneva K, Sturdevant DE, Porcella  
717 SF, Heinzen RA. 2009. Host cell-free growth of the Q fever bacterium *Coxiella burnetii*.  
718 *Proc Natl Acad Sci U S A* 106:4430-4.
- 719 88. Liberzon A, Subramanian A, Pinchback R, Thorvaldsdottir H, Tamayo P, Mesirov JP.  
720 2011. Molecular signatures database (MSigDB) 3.0. *Bioinformatics* 27:1739-40.
- 721 89. Mulye M, Samanta D, Winfree S, Heinzen RA, Gilk SD. 2017. Elevated Cholesterol in  
722 the *Coxiella burnetii* Intracellular Niche Is Bacteriolytic. *MBio* 8:02313-16

723

## 724 **FIGURE LEGENDS**

725 **Figure 1: *C. burnetii* infection alters the gene expression profile of alveolar macrophages in**  
726 **a T4BSS-dependent manner.**

727 Transcriptome of MH-S macrophages infected with wildtype (WT) or *icmD* T4SS mutant *C.*

728 *burnetii* at 24 or 48 hpi. (A) Principal components analysis (PCA) of genome-wide expression  
729 across all RNA-seq samples after normalization of raw data. (B) Venn diagram of differentially  
730 expressed genes for each comparison for each time point using an absolute  $\log_2$  fold-change  
731 ( $\logFC$ ) of  $>0.585$  (1.5-fold in linear space) and a false discovery rate (FDR)  $<0.05$ . (C)  
732 Unsupervised hierarchical clustering heat map of  $\log_2$  fold-change values for all six comparisons  
733 using ward. D2 clustering method and euclidean distance. Red intensity indicates increased  
734 expression in first group relative to second group, whereas blue intensity indicates decreased  
735 expression. (D) Ingenuity Pathways Analysis (IPA) using differentially expressed genes for the  
736 comparison between WT-infected cells and *icmD*-infected cells at 24 hpi. Red shading indicates  
737 increased pathway activity in *icmD* mutant-infected cells, whereas blue shading indicates  
738 increased pathway activity in WT-infected cells based on IPA activity z-scores. White shading  
739 indicates no activity pattern predicted or could be determined.

740

741 **Figure 2: *C. burnetii* T4BSS effector proteins downregulate expression of the IL-17**  
742 **pathway.**

743 Quantitative RT-PCR gene expression analysis of IL-17 pathway genes in macrophages infected  
744 with wildtype (WT) or *dotA* mutant *C. burnetii* for 24 or 48 hpi. Mock-infected macrophages  
745 treated with LPS (100 ng/ml) for 24 hours were used as a positive control. Individual genes were  
746 normalized to *Gapdh* and the fold change in expression over mock-infected cells determined.  
747 When compared to WT-infected cells, macrophages infected with *dotA* mutant *C. burnetii* have  
748 higher expression of the IL-17 pathway genes (A) *IL1a*, (B) *IL1b*, (C) *Tnfa*, (D) *Cxcl2*, (E) *Ccl5*,  
749 and (F) *Lcn2*. Error bars show the average  $\pm$  SEM of three independent experiments,  
750 performed in biological duplicate with three technical replicates. \* $p<0.05$ , \*\* $p<0.01$ ,

751 \*\*\* $p < 0.005$  and \*\*\*\* $p < 0.001$  as determined by one-way ANOVA with Tukey's posthoc test  
752 compared to mock-infected or between WT and *dotA* mutant-infected cells.

753

754 **Figure 3. The *C. burnetii* T4BSS decreases secretion of CXCL2/MIP-2 and CCL5/RANTES**  
755 **in infected MH-S macrophages.**

756 ELISA protein quantitation of CXCL2/MIP-2, CCL5/RANTES and Lipocalin-2 (LCN2) in the  
757 supernatant of macrophages infected with WT or *dotA* mutant *C. burnetii* at 24 or 48 hpi. Cells  
758 treated with LPS (100ng/ml) were used as a positive control. Compared to mock-infected and  
759 WT-infected macrophages at 24 hpi, *dotA* mutant-infected macrophages have increased secretion  
760 of (A) CXCL2/MIP-2 and (B) CCL5/RANTES, but not (C) LCN2. Shown are the means +/-  
761 SEM from three independent experiments done in duplicate. \* $p < 0.05$ , \*\* $p < 0.01$ , \*\*\* $p < 0.005$   
762 and \*\*\*\* $p < 0.001$  as determined by one-way ANOVA with Tukey's posthoc test.

763

764 **Figure 4. *C. burnetii* T4BSS blocks IL-17 stimulated secretion of CXCL2/MIP-2 and**  
765 **CCL5/RANTES.**

766 ELISA quantitation of (A) CXCL2/MIP-2 and (B) CCL5/RANTES protein levels after IL-17A  
767 (100 ng/ml) treatment of mock-infected, WT-infected, or *dotA* mutant-infected macrophages at  
768 24 hpi. The means +/- SEM of three individual experiments, performed in duplicate are shown.  
769 \* $p < 0.05$ , \*\* $p < 0.01$ , and \*\*\*\* $p < 0.001$  as determined by one-way ANOVA with Tukey's posthoc  
770 test compared to mock-infected, or between WT and *dotA* mutant-infected cells.

771

772 **Figure 5. Activating the macrophage IL-17 pathway can kill *C. burnetii*, but the T4BSS**  
773 **effector proteins play a protective role**

774 MH-S cells were infected for 24 hours, followed by treatment for 24 hours with either **(A)** IL-17  
775 alone or **(B)** IL-17 and an IL-17A receptor blocking antibody (2 µg/ml). hMDMs **(C)** were  
776 infected for 24 hours and treated with human IL-17A for 24 hours. Viable bacteria were  
777 quantitated using an agarose-based colony forming unit (CFU) assay, and the loss of bacterial  
778 viability calculated by dividing the number of WT or T4SS mutant bacteria in treated samples to  
779 their respective untreated (-) samples. Compared to WT bacteria, the *dotA* T4BSS mutant is more  
780 sensitive to IL-17 in both MH-S and hMDMs, and viability of both WT and *dotA* mutant *C.*  
781 *burnetii* can be recovered by blocking IL-17 receptor signaling. Error bars indicate the mean +/-  
782 SEM from four individual experiments. \*p<0.05, \*\*p<0.01, \*\*\*p<0,005 and \*\*\*\*p<0.001 as  
783 determined by one-way ANOVA with Dunnett's posthoc test compared to untreated controls.  
784



## Figure 1

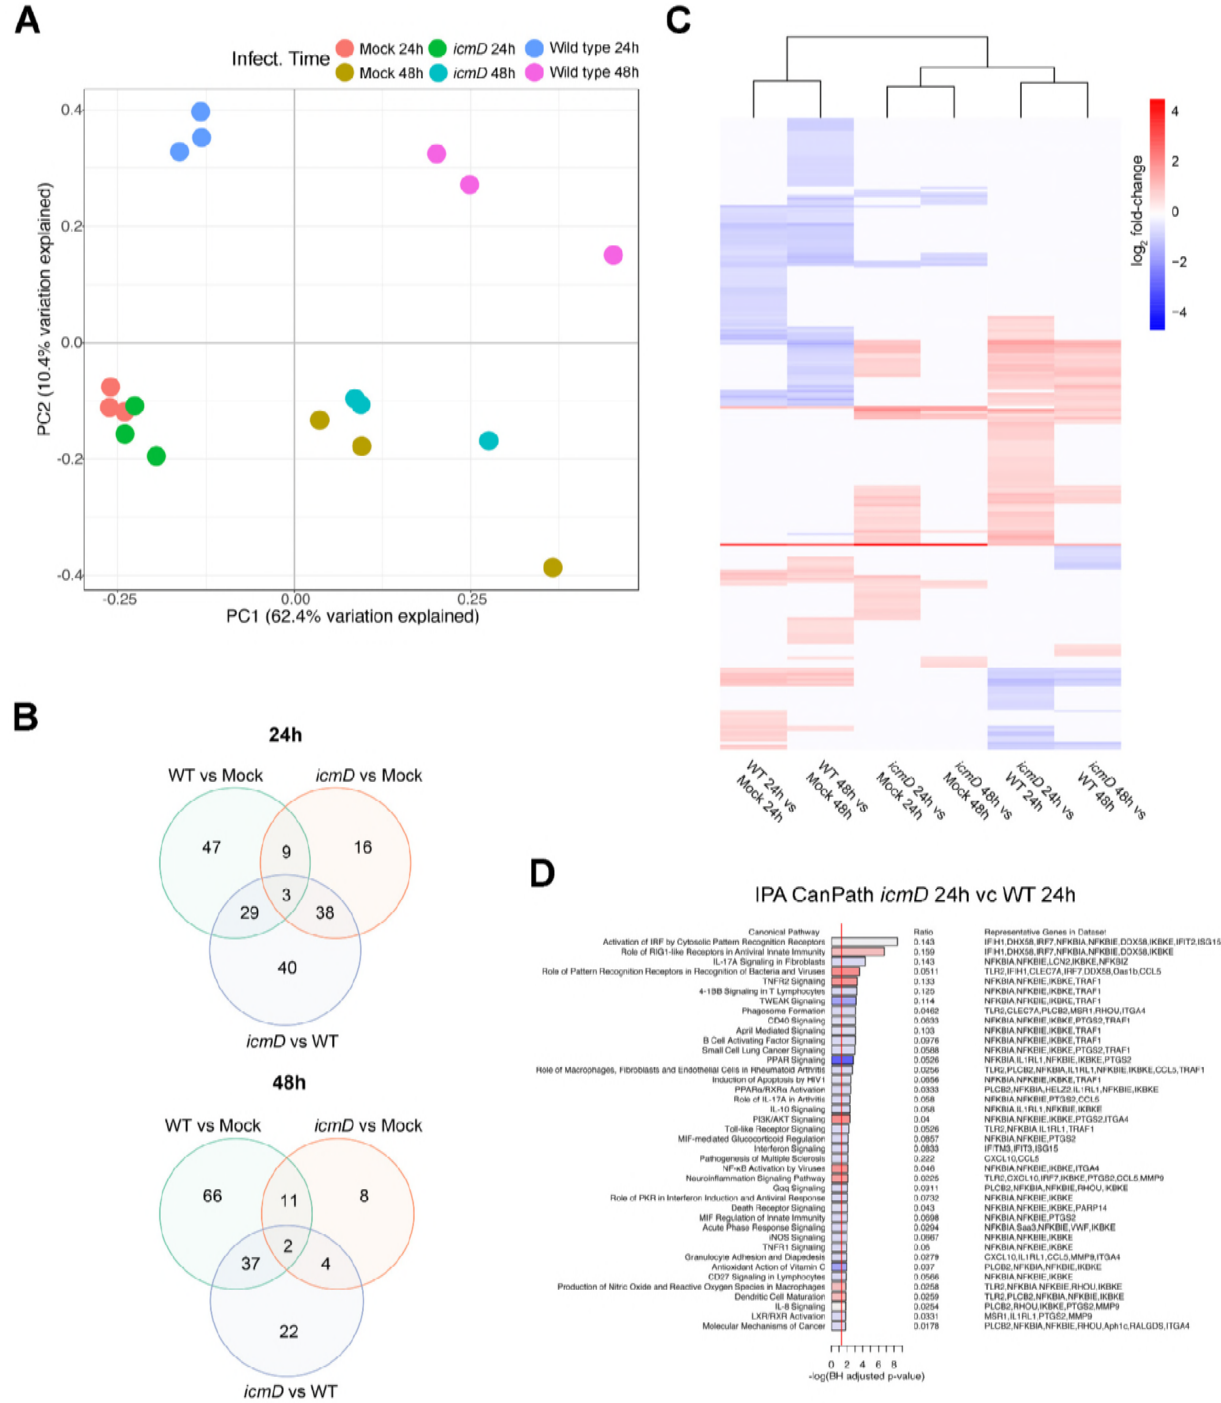

**Figure 2**

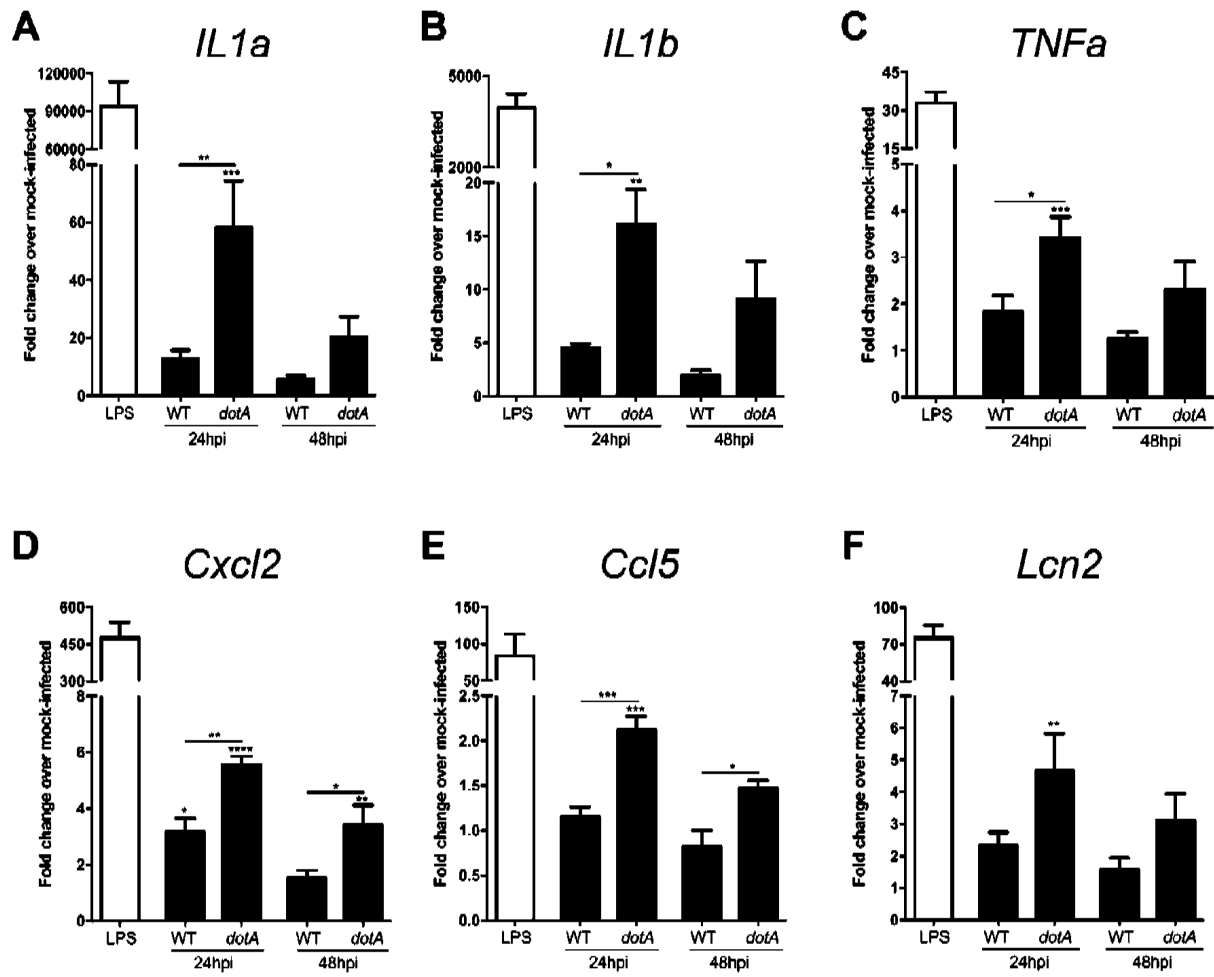

### Figure 3

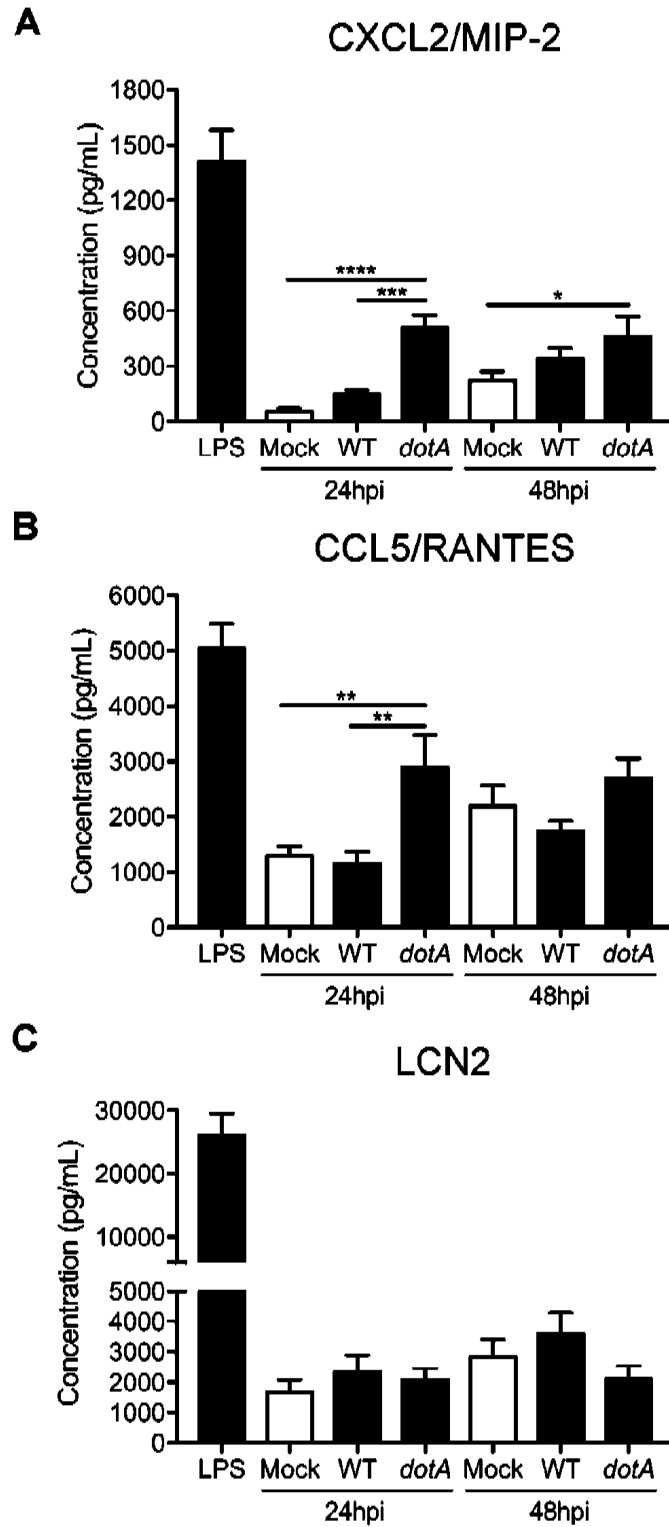

## Figure 4

**A**

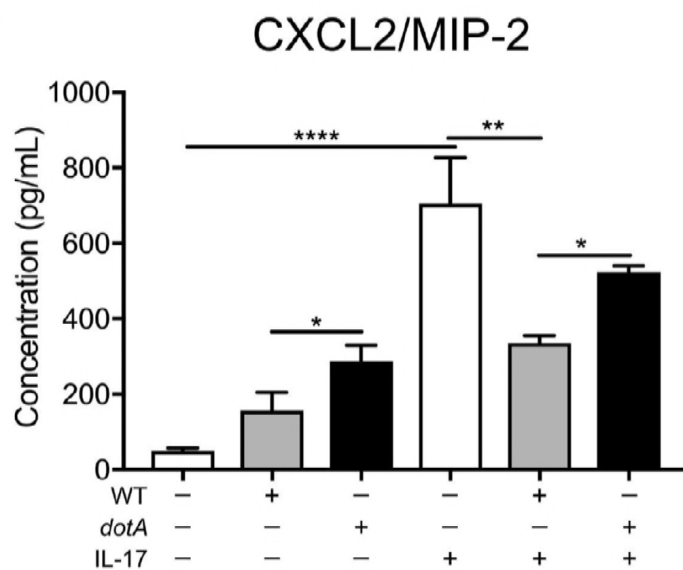

**B**

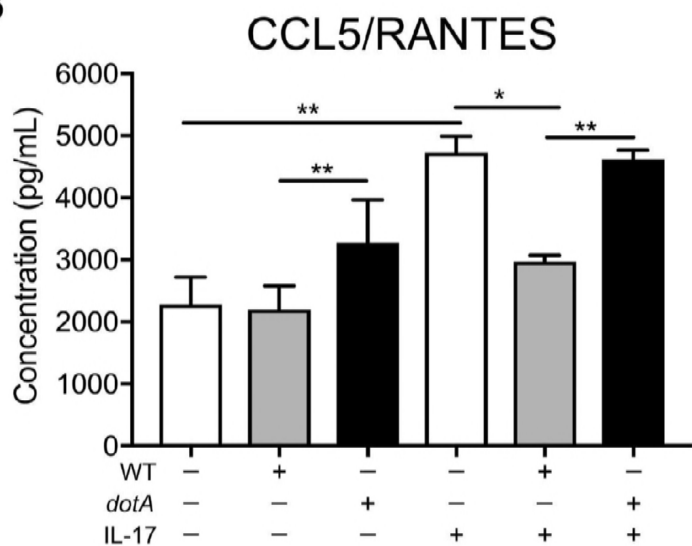

## Figure 5

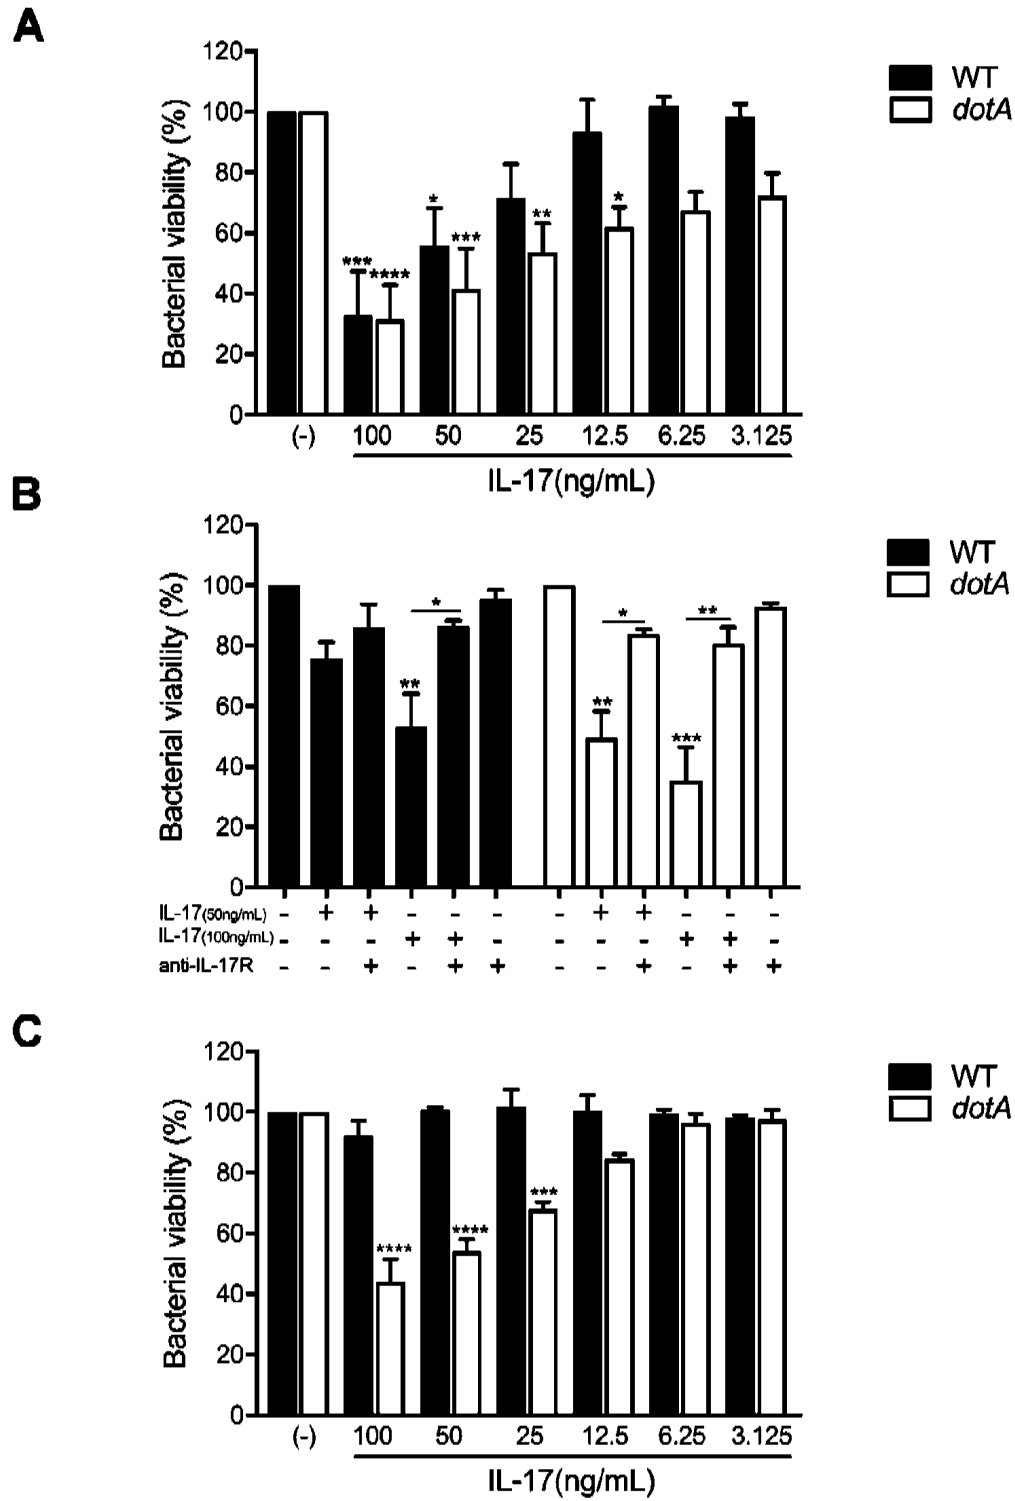

Source: http://biorxiv.org/content/10.1101/367920v1.full.pdf
